# Supplementary material for: Aligning curved stacking bands to simultaneously strengthen and toughen lamellar materials
Source: Royal Society of Chemistry journal article supplement (doi:10.1039/d2mh01023b), 2022-11-22
Supplement: d2mh01023b1.pdf [file d2mh01023b1.pdf]

1

# Supporting Materials for

2

## Aligning Curved Stacking Bands to Simultaneously

3

## Strengthen and Toughen Lamellar Materials

4 Yanqiu Jiang<sup>a, b#</sup>, Fan Guo<sup>a, d#</sup>, Jiacheng Zhang<sup>c</sup>, Zhen Xu<sup>a\*</sup>, Fang Wang<sup>a</sup>, Shengying

5 Cai<sup>a</sup>, Yingjun Liu<sup>a</sup>, Yi Han<sup>e</sup>, Chen Chen<sup>e</sup>, Yilun Liu<sup>c\*</sup>, Weiwei Gao<sup>a</sup> & Chao Gao<sup>a\*</sup>

6 <sup>a</sup>MOE Key Laboratory of Macromolecular Synthesis and Functionalization, Department of Polymer

7 Science and Engineering, Key Laboratory of Adsorption and Separation Materials & Technologies

8 of Zhejiang Province, Zhejiang University, 38 Zheda Road, Hangzhou 310027, China.

9 <sup>b</sup> State Key Lab of Chemical Engineering, College of Chemical and Biological Engineering,

10 Zhejiang University, Hangzhou 310027, China.

11 <sup>c</sup> State Key Laboratory for Strength and Vibration of Mechanical Structures, School of Aerospace,

12 Xi'an Jiaotong University, 710049 Xi'an, P. R. China.

13 <sup>d</sup> National Special Superfine Powder Engineering Research Center, Nanjing University of Science

14 and Technology, 1 Guanghua Road, Nanjing 210094, P. R. China.

15 <sup>e</sup> Hangzhou Gaoxi Technology Co., Ltd., Hangzhou 310027, China.

16 <sup>#</sup> Y. Jiang and F. Guo contribute equally to this work.

17 \*Corresponding author Email: zhenxu@zju.edu.cn; yilunliu@mail.xjtu.edu.cn;

18 chaogao@zju.edu.cn

19

20 **This PDF file includes:**

21 Fig. S1 to S18

22 Table S1

23

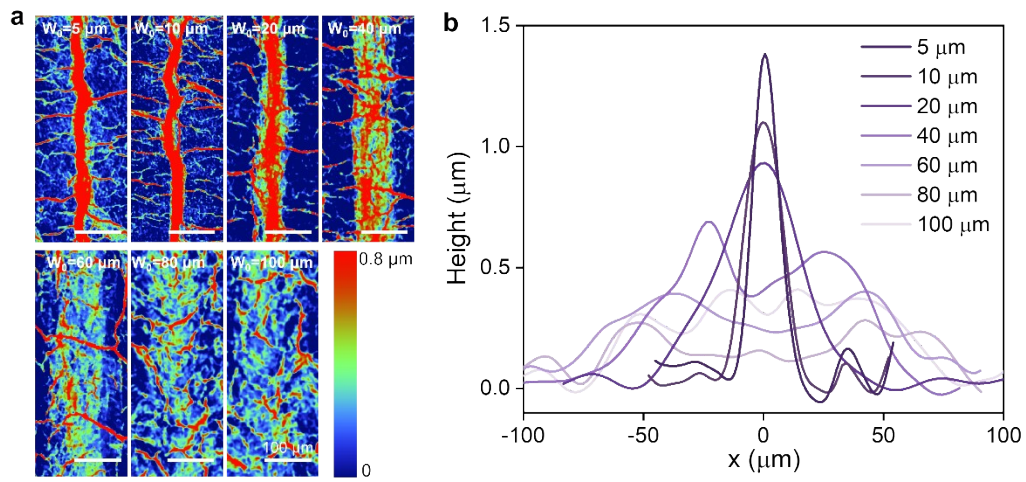

1  
 2 **Fig. S1** (a) WLI images of the surface morphology of CS bands constructed by probes  
 3 with different diameters. (b) Typical section profiles of CS bands constructed by  
 4 probes with different diameters.  
 5  
 6

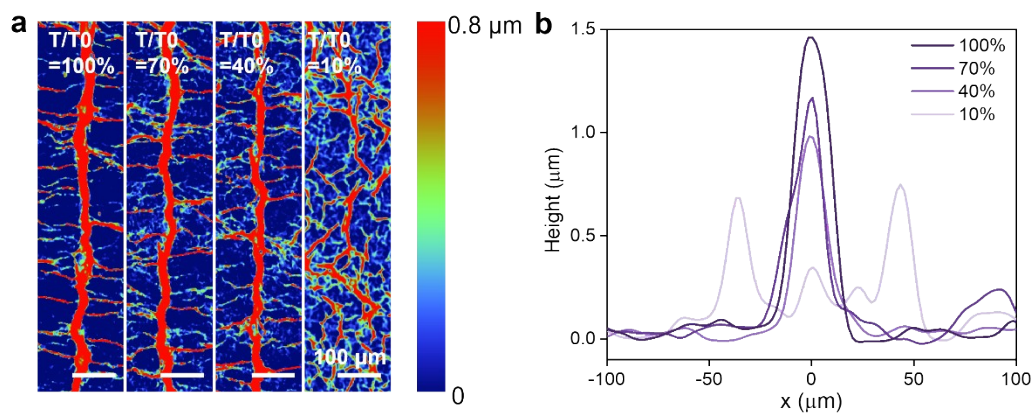

1

2 **Fig. S2 (a)** WLI images of the surface morphology of CS bands constructed by probes  
 3 with different relative immerse depths. **(b)** Typical section profiles of CS bands  
 4 constructed by probes with different relative immerse depths.

5

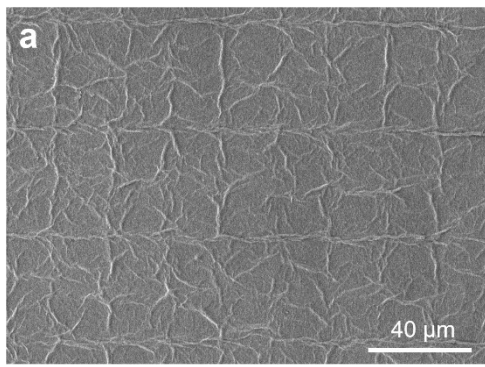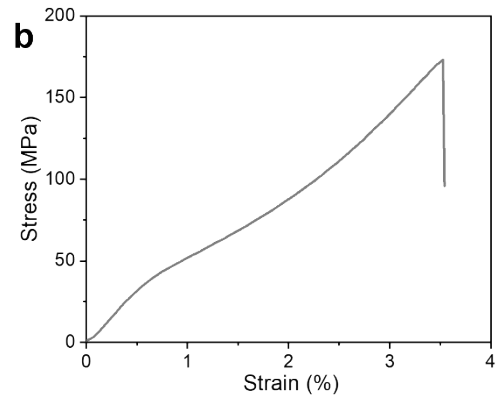

1  
2 **Fig. S3 (a)** SEM images of the surface morphology of GOF films with biaxial aligned  
3 CS bands. **(b)** Stress-strain curves of GOF films with biaxial aligned CS bands.  
4  
5  
6

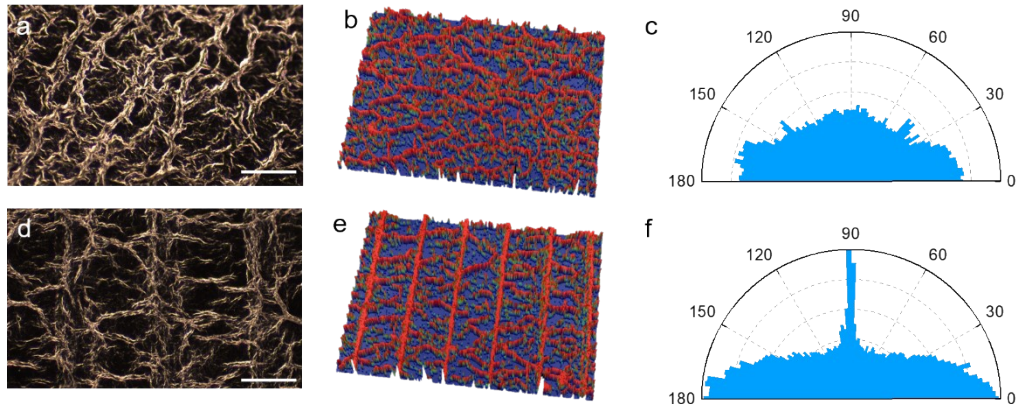

1

2 **Fig. S4 (a-c)** Dark field optical image (a), WLI image (b) and orientation distribution

3 (c) of the surface wrinkles for GF. **(d-f)** Dark field optical image (d), WLI image (e)

4 and orientation distribution (f) of the surface wrinkles for G200. (Scale bars: a, d 100

5  $\mu\text{m}$ )

6

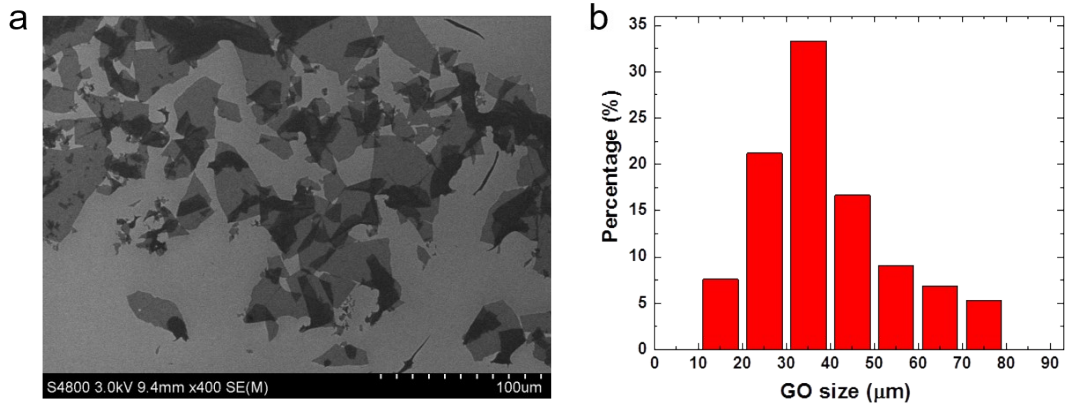

1

2 **Fig. S5 (a)** SEM images of GO sheets. **(b)** Statistics of lateral size distribution of GO  
3 sheets.

4

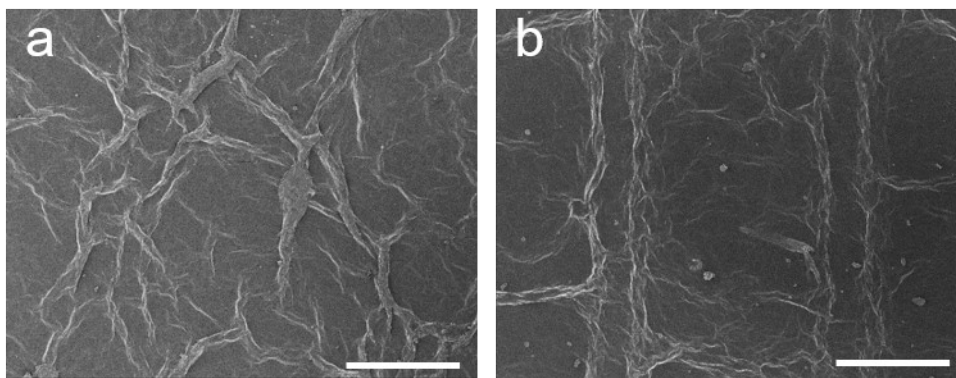

1

2 **Fig. S6** SEM images of the surface wrinkles for GF (**a**) and G200 (**b**). (Scale bars: a, b

3 100  $\mu\text{m}$ )

4

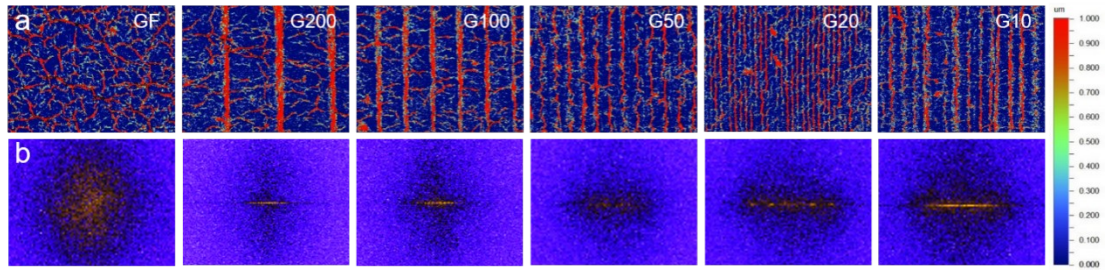

1

2 **Fig. S7 (a)** WLI images of the surface wrinkle of GFs with different  $d$ . **(b)** Their

3 corresponding FFT spectra.

4



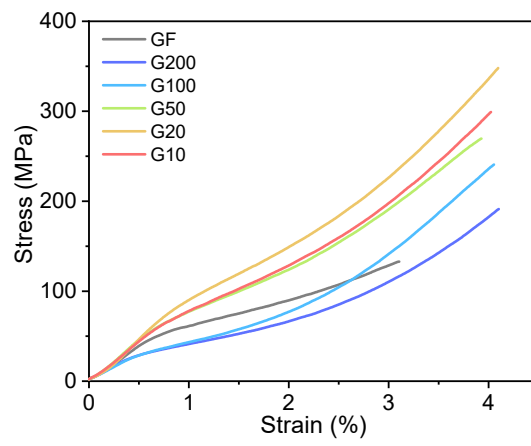

1

2 **Fig. S8** Uniaxial tensile stress-strain curves for GF, G200, G100, G50, G20 and G10

3 films.

4

5

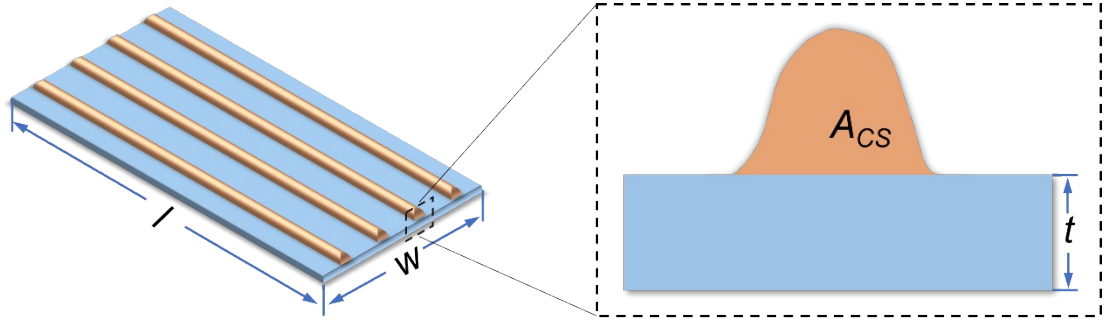

1

2 **Fig. S9** Schematic diagram of the calculation process of cross-sectional areas ( $A$ ) for

3 GOF with aligned ridges.

4

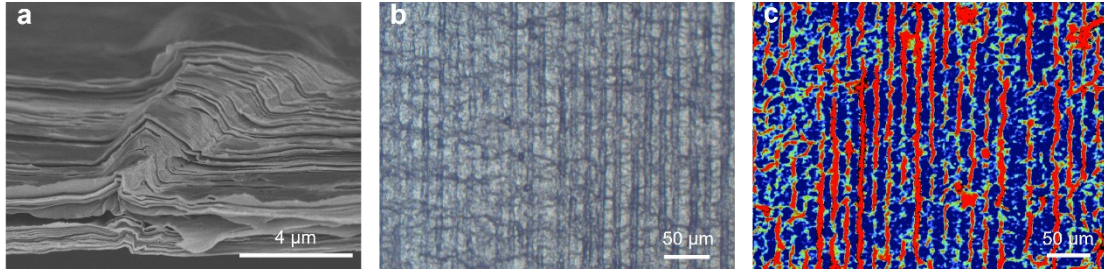

1

2 **Fig. S10** (a) SEM images of the section morphology of CS bands after prolonged  
3 stretching. (b, c) POM and WLI images of the surface morphology of CS bands after  
4 prolonged stretching.

5

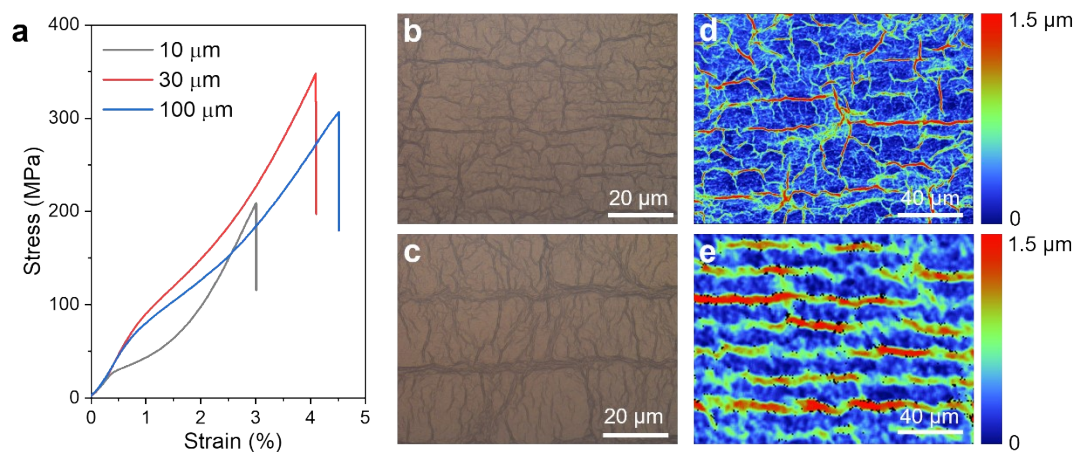

1

2 **Fig. S11 (a)** Stress-strain curves of G20 films made of GO sheets with different lateral  
 3 sizes. **(b, c)** POM images of the surface morphology of G20 films made of GO sheets  
 4 with lateral sizes of (b) 10 μm and (c) 100 μm. **(d, e)** WLI images of the surface  
 5 morphology of G20 films made of GO sheets with lateral sizes of (d) 10 μm and (e)  
 6 100 μm.

7

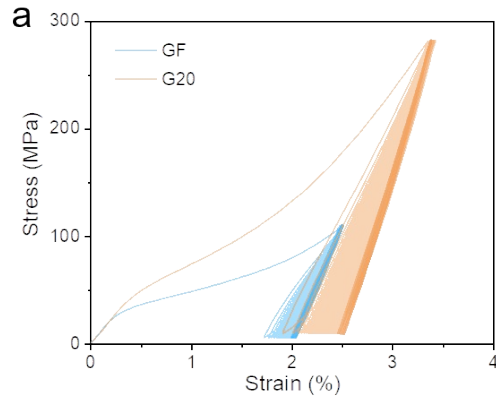

1

2 **Fig. S12** Tensile stress-strain curves of GF and G20 films during 1000 tensile loading-  
3 unloading cycles.

4

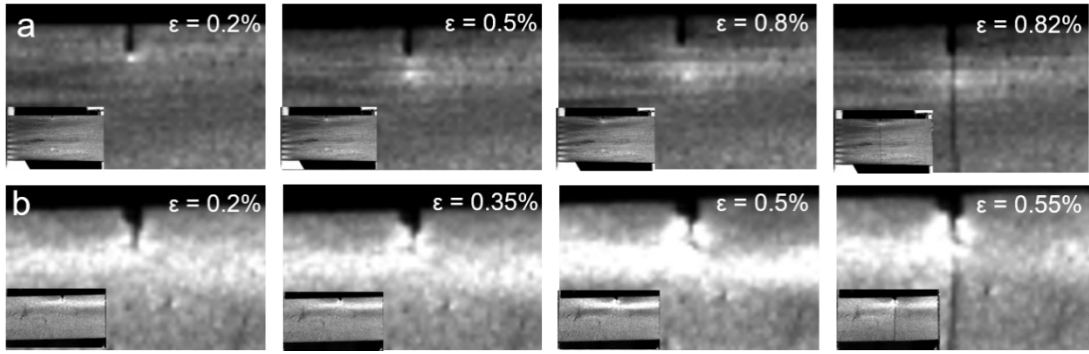

1

2 **Fig. S13** Images taken by high-speed camera to track the fracture process of G20 (a)

3 and GF (b) films.

4

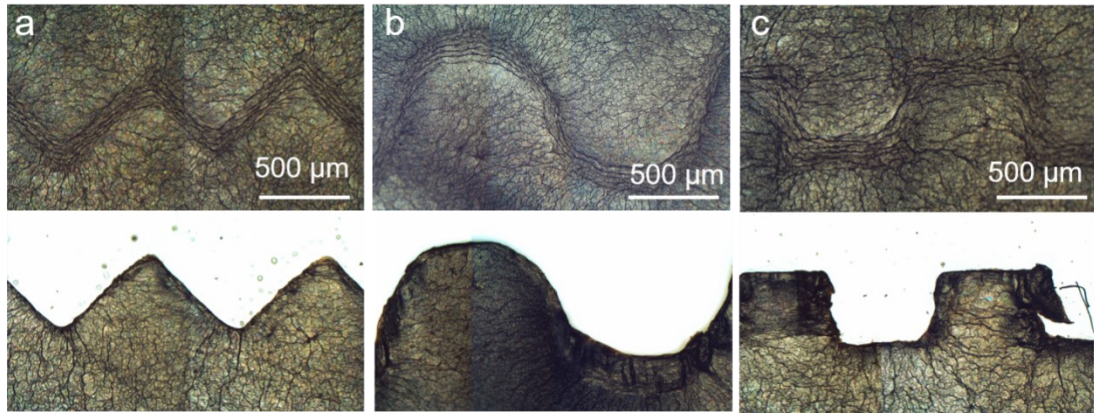

1

2 **Fig. S14** Optical images of GFs with CS bands aligned in (a) jagged, (b) wavy, and (c)  
3 step-like manner and their corresponding fracture surface.

4

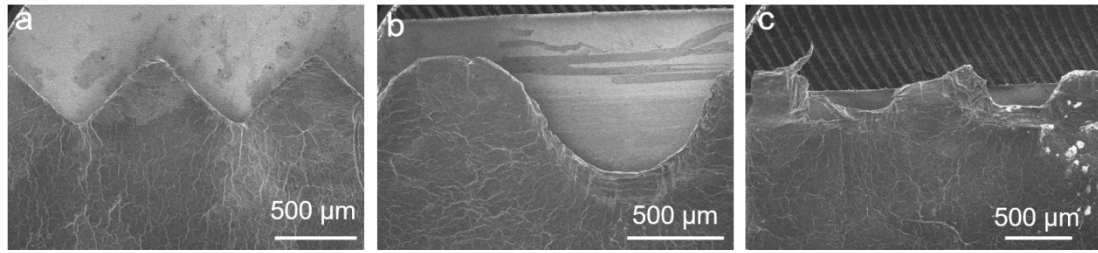

1

2 **Fig. S15** SEM images of fracture surface of GFs with CS bands aligned in (a) jagged,

3 (b) wavy, and (c) step-like manner.



1

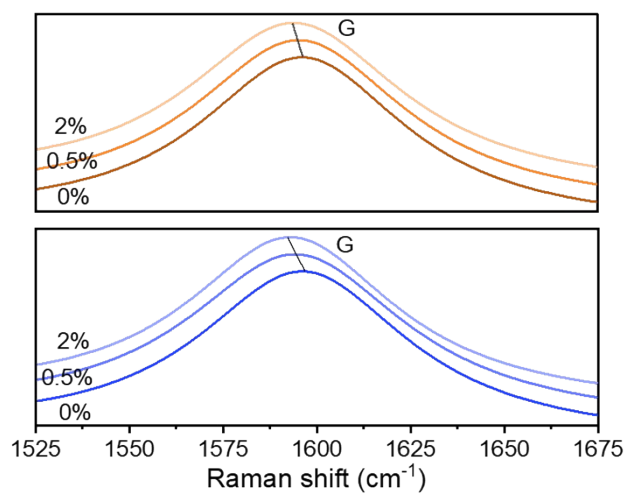

2

3 **Fig. S16** The Raman shift of G peak in CS bands (top, orange) and plain area (bottom,  
4 blue) for G20 films under different tensile strains.

5

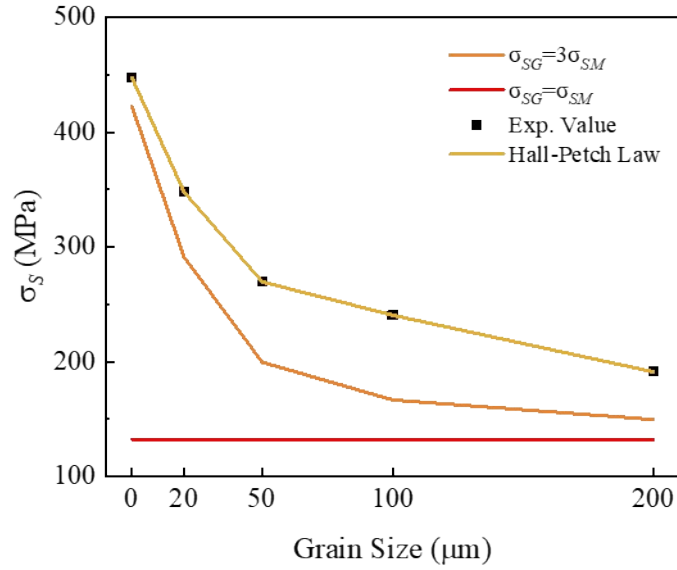

1

2 **Fig. S17** Grain size effect of LMs and CS bands enhancement effect. From the

3 perspective of composite, the mixture strength is expressed:  $\bar{\sigma}_S = \sigma_{SG}f_G + \sigma_{SM}f_M$ ,

4 where  $f_G$  is the CS bands volume fraction,  $f_M$  is the membrane volume fraction,

5  $\sigma_{SG}$  is the fracture strength of the CS bands, and  $\sigma_{SM}$  is the fracture strength of the

6 membrane. Even we assume the strength of CS bands is 3 times of the membrane

7 strength (we think the ridge strength is only comparable to the membrane strength due

8 to the similar constituent and structure), the predicted fracture strength is still much

9 smaller than the experiments.

10

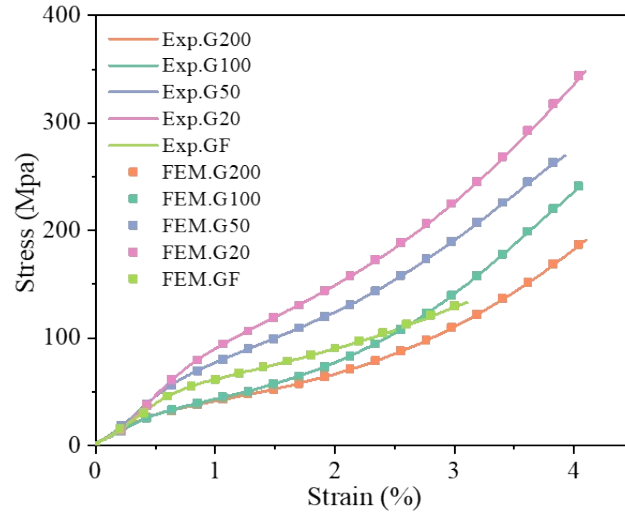

1

2 **Fig. S18** Comparison of FEM results with experimental stress-strain curves for

3 different GFs.

4

1 **Table S1** The mechanical property data of our ridged GFs and other GO based films.

2

| Sample                                 | Strength (MPa) | Toughness (MJ m <sup>-3</sup> ) | Reference                                              |
|----------------------------------------|----------------|---------------------------------|--------------------------------------------------------|
| Nacre                                  | 200            | 2.6                             | <i>Nat. Mater.</i> <b>2015</b> , 14, 23                |
| GO-PVA                                 | 80.2           | 0.1                             | <i>Adv. Funct. Mater.</i> <b>2010</b> , 20, 3322       |
| GO-PMMA                                | 148.3          | 2.35                            | <i>Adv. Funct. Mater.</i> <b>2010</b> , 20, 3322       |
| GO-Al <sub>2</sub> O <sub>3</sub> -PVA | 143            | 9.2                             | ACS Appl. Mater. Interfaces 2015, 7, 9281              |
| GO-SA                                  | 240            | 1.3                             | <i>Nano Res.</i> <b>2016</b> , 9, 735                  |
| GO-Ca <sup>2+</sup>                    | 125.8          | 0.31                            | <i>ACS Nano</i> , <b>2008</b> , 2, 572                 |
| GO-Mg <sup>2+</sup>                    | 80.6           | 0.13                            | <i>ACS Nano</i> , <b>2008</b> , 2, 572                 |
| GO-Al <sup>3+</sup>                    | 100.5          | 0.23                            | <i>Nat. Chem.</i> <b>2015</b> , 7, 166                 |
| GO-Zn <sup>2+</sup>                    | 142.2          | 0.32                            | <i>Chem. Commun.</i> <b>2015</b> , 51, 2671            |
| GO-GA                                  | 101            | 0.3                             | <i>ACS Nano</i> , <b>2011</b> , 5, 2134                |
| GO-borate                              | 185            | 0.14                            | <i>Adv. Mater.</i> <b>2011</b> , 23, 3842              |
| GO-PEI                                 | 209.9          | 0.23                            | <i>Adv. Mater.</i> <b>2013</b> , 25, 2980              |
| GO-PCDO                                | 129.6          | 3.91                            | <i>Angew. Chem., Int. Ed.</i> , <b>2013</b> , 52, 3750 |
| GO-PAA                                 | 91.9           | 0.21                            | <i>J. Phys. Chem. C</i> , <b>2009</b> , 113, 15801     |
| GO-PDA                                 | 266            | 4.92                            | <i>Adv. Funct. Mater.</i> <b>2017</b> , 27, 1605636    |
| GO-CNC                                 | 490            | 3.9                             | <i>Adv. Mater.</i> <b>2016</b> , 28, 1501              |
| GO-annealing                           | 211            | 3.91                            | <i>Adv. Mater.</i> <b>2014</b> , 26, 7588              |
| GF                                     | 133            | 2.35                            | This work                                              |
| G20                                    | 348            | 6.64                            | This work                                              |

3
